# Supplementary material
Source: PubMed Central journal article supplement (PMC5321499)

Supplementary Figure 1 – Original DNA gel images with size marker indications

Figure 2d

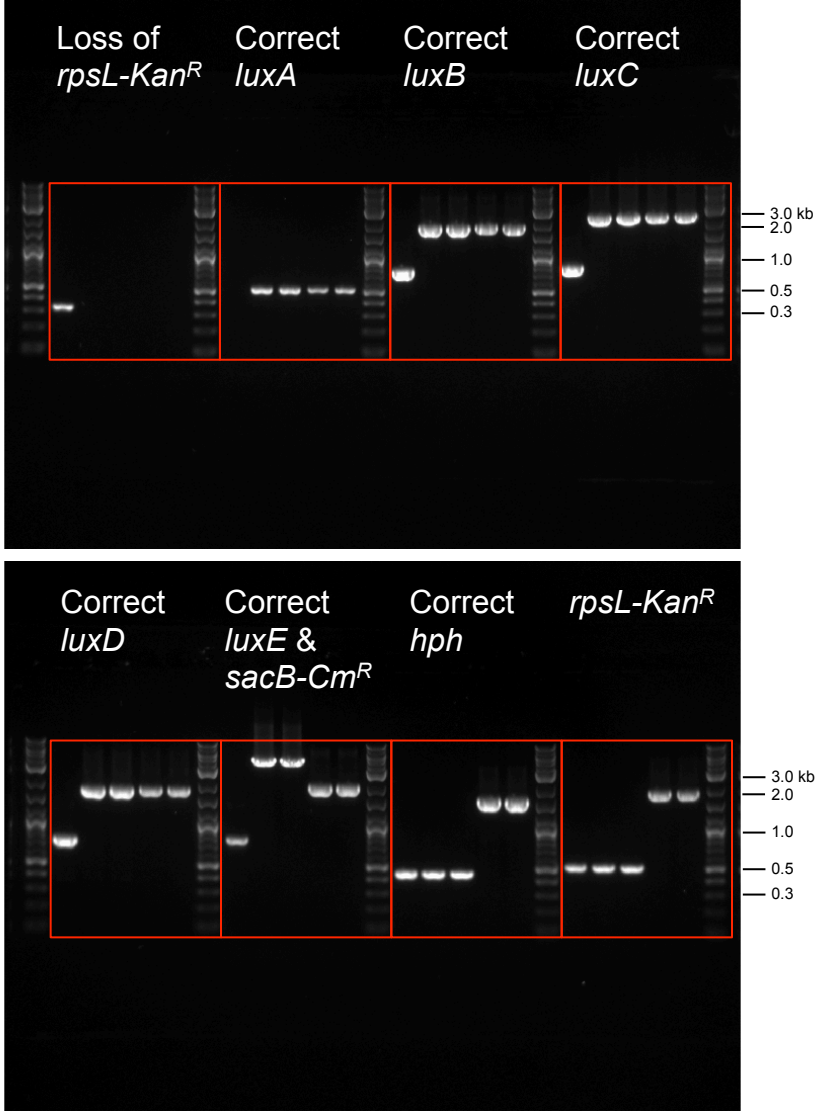

Ext Data Fig 1b

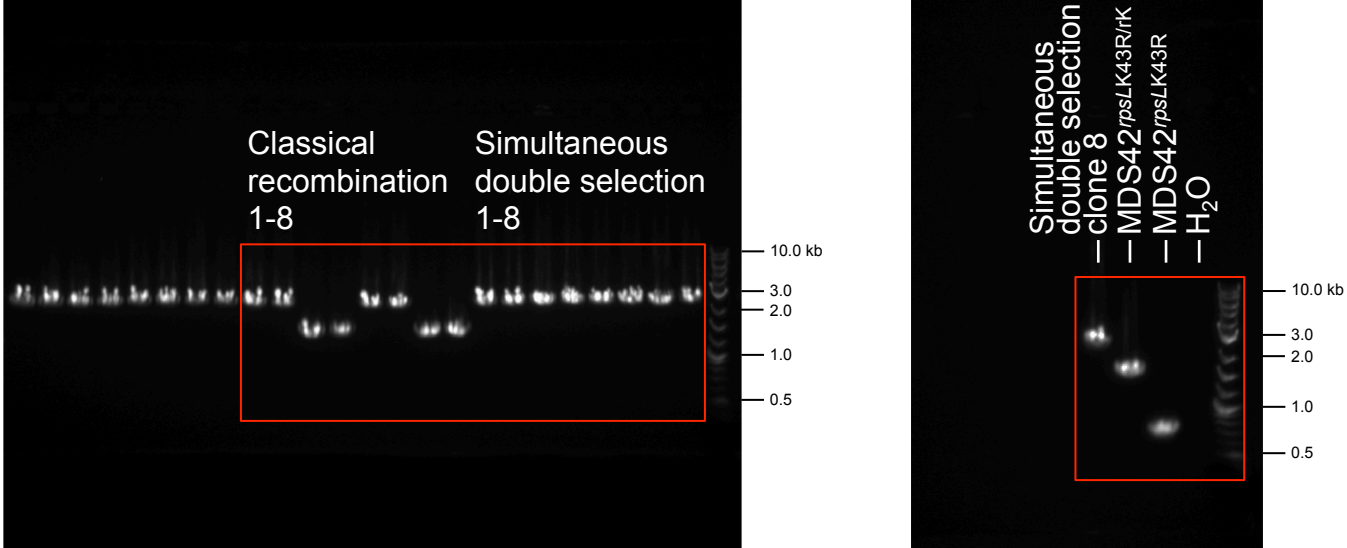

Ext Data Fig 2b

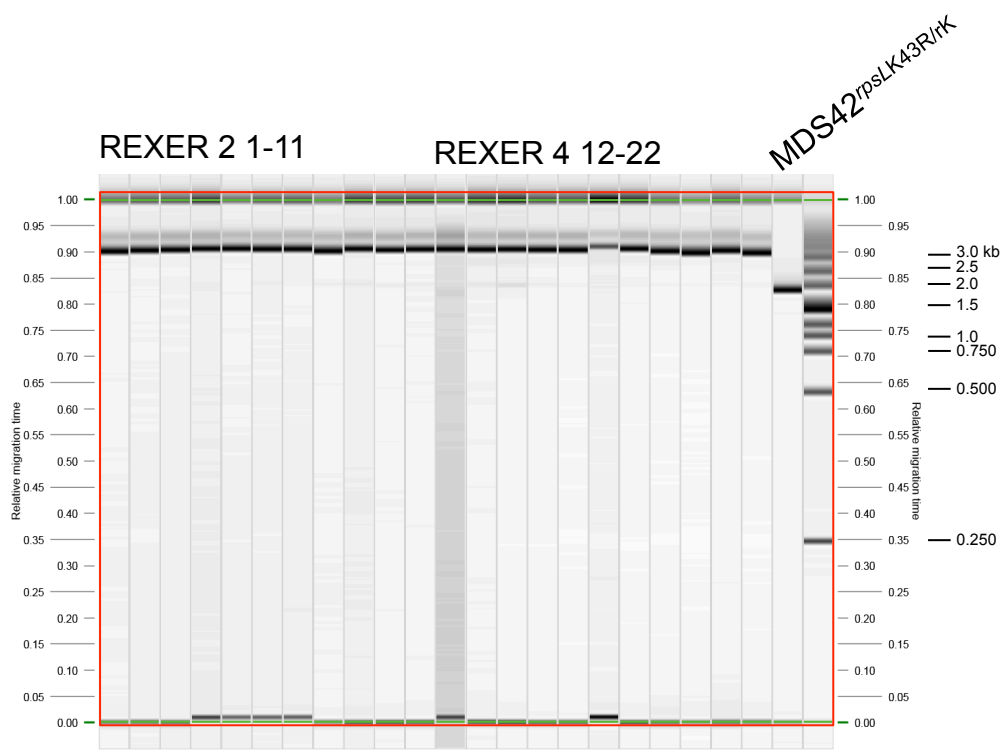

Ext Data Fig 2c

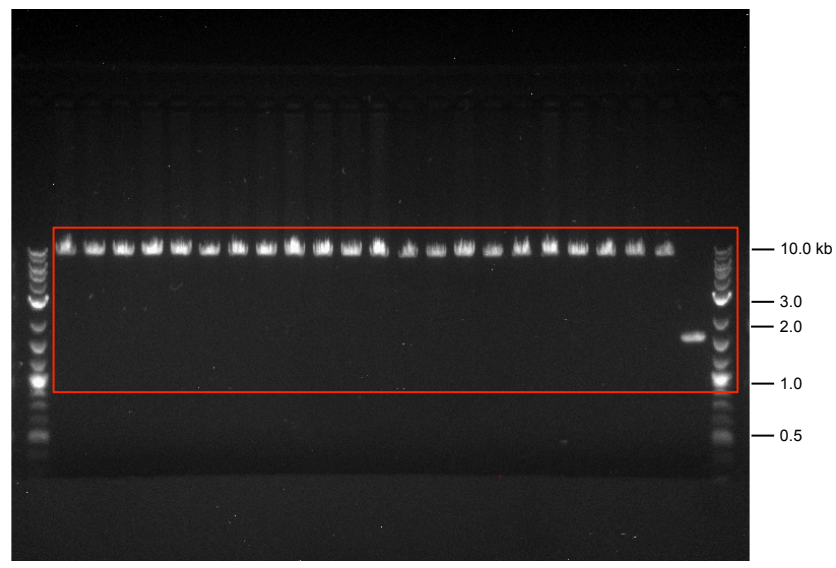

Ext Data Fig 2d

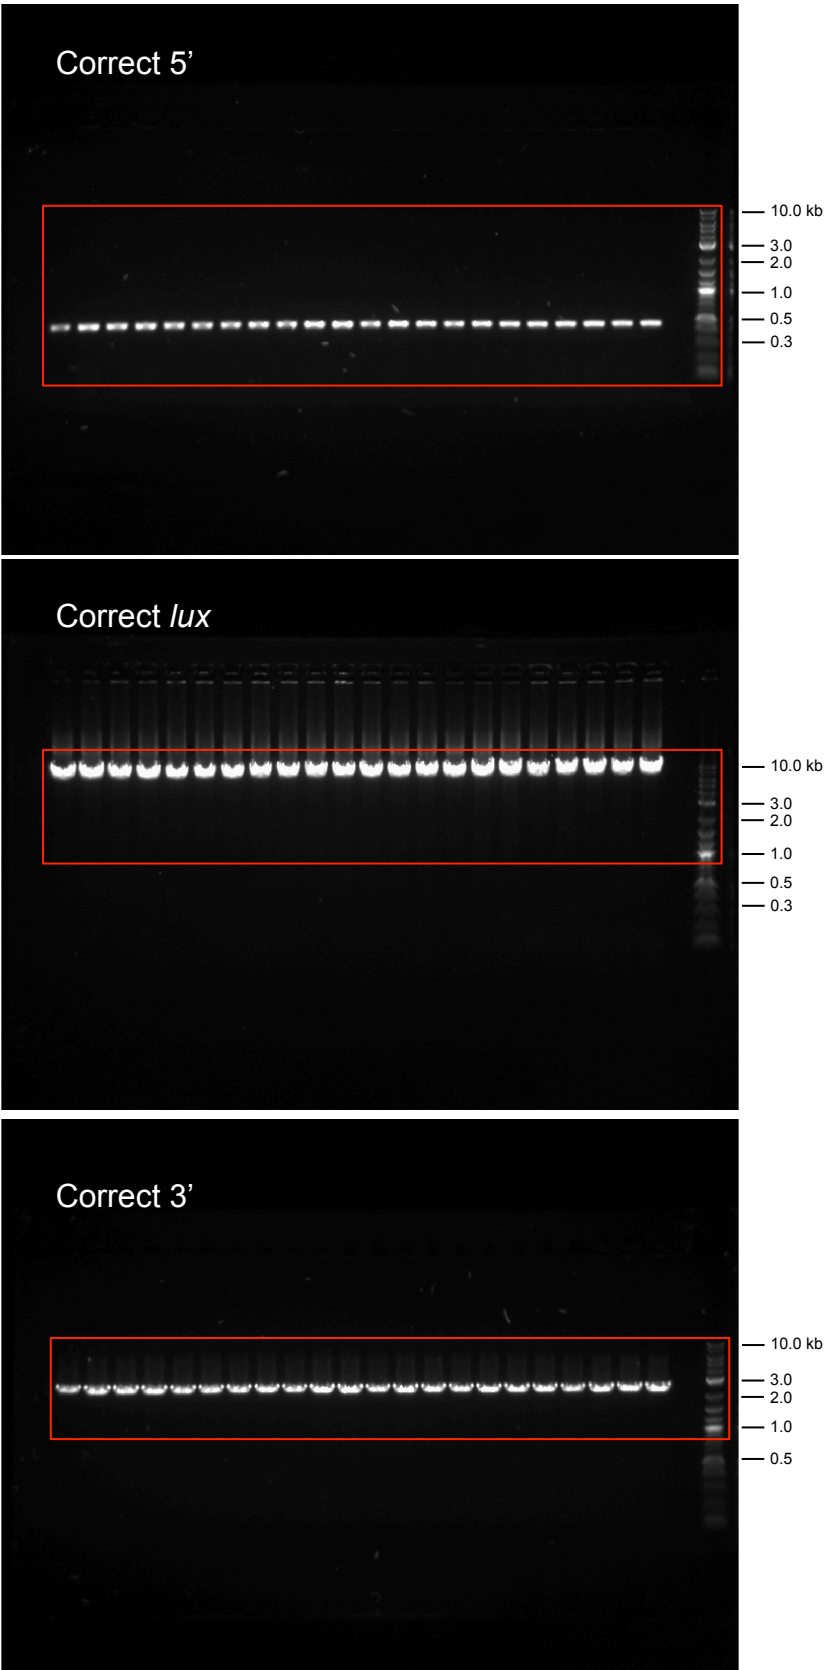

Ext Data Fig 3c

Loss of *rpsL-Kan<sup>R</sup>*

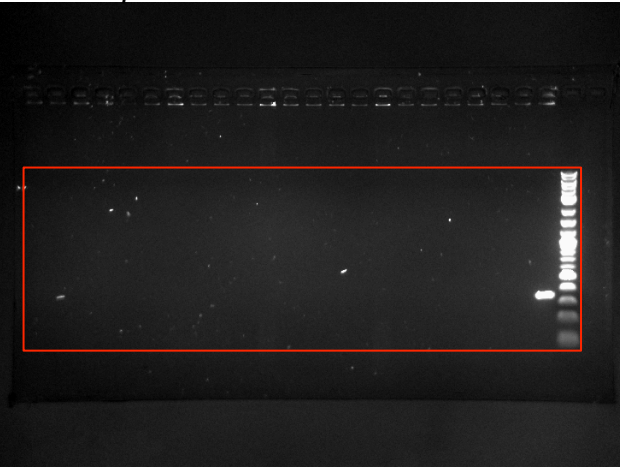

Correct *luxA*

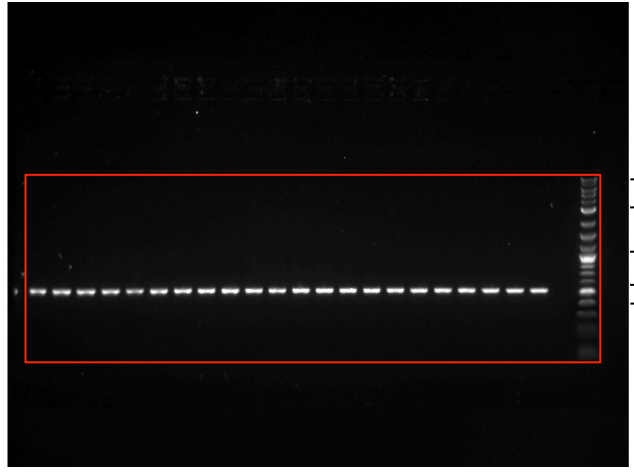

Correct *luxB*

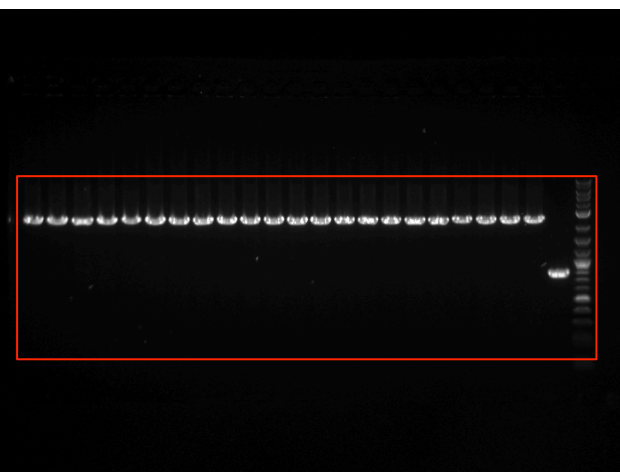

Correct *luxC*

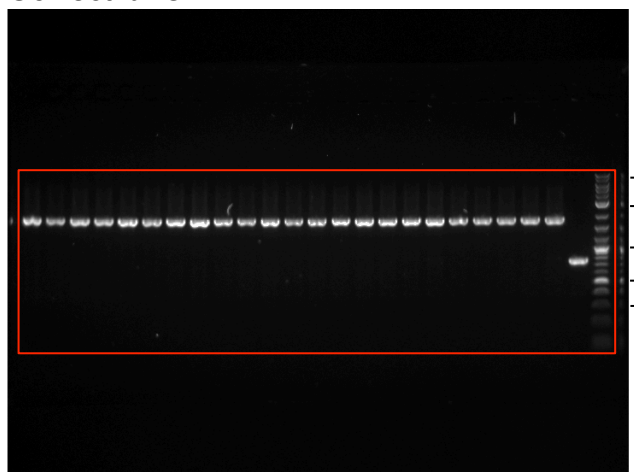

Correct *luxD*

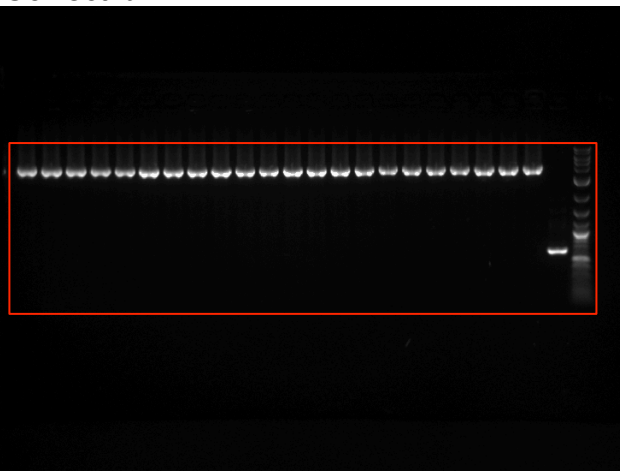

Correct *luxE & sacB-Cm*

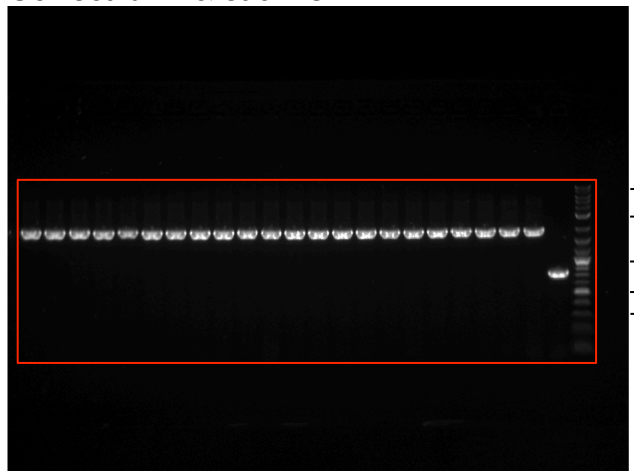

Loss of *rpsL-Kan<sup>R</sup>*

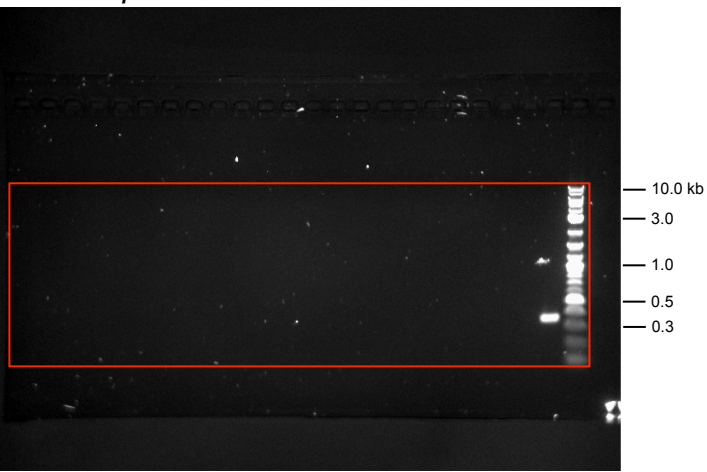

Correct *luxA*

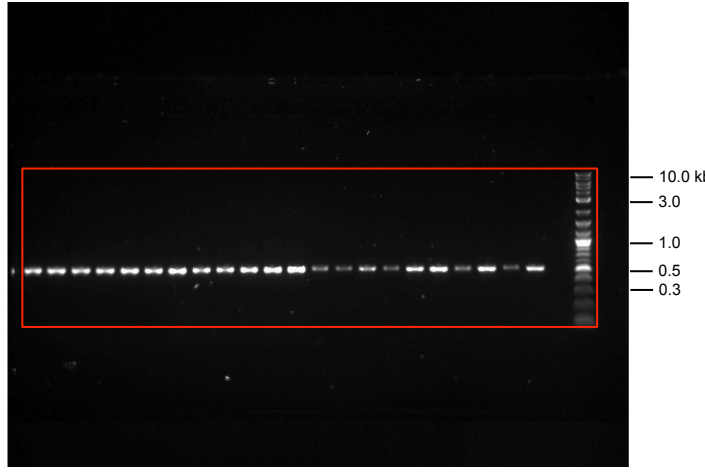

Correct *luxB*

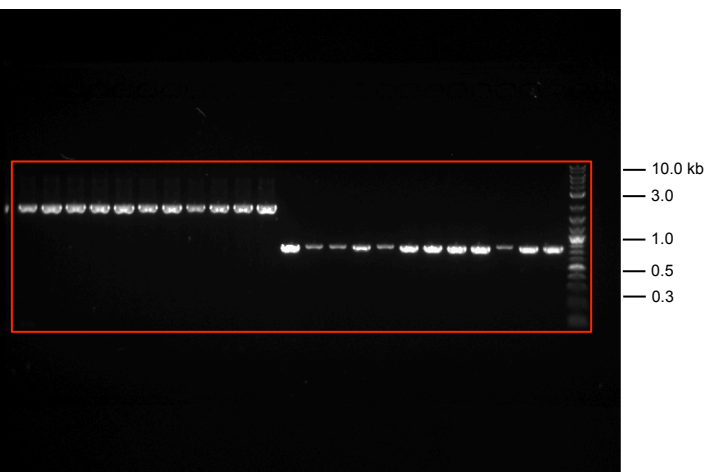

Correct *luxC*

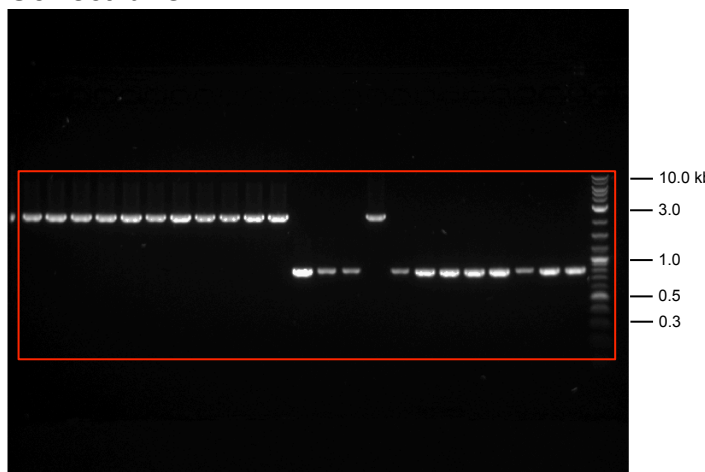

Correct *luxD*

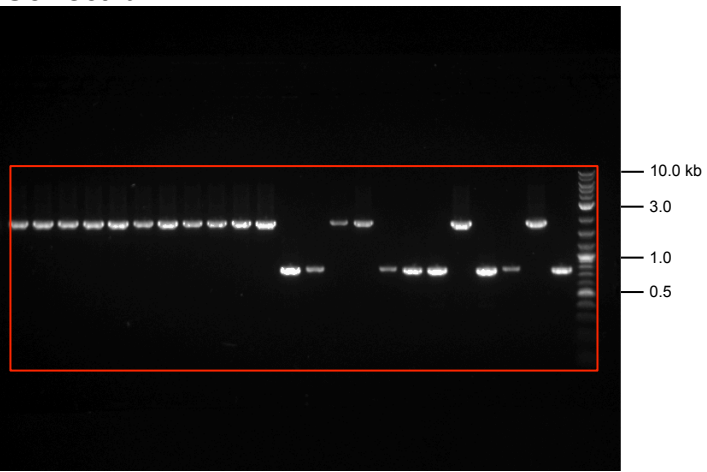

Correct *luxE & sacB-Cm*

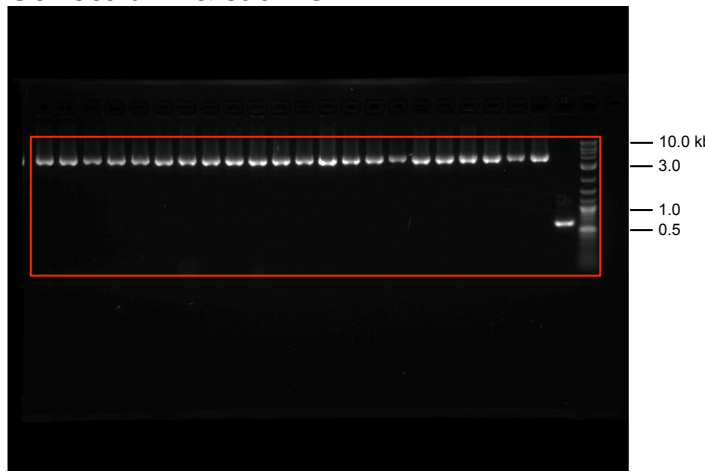

Ext Data Fig 4b

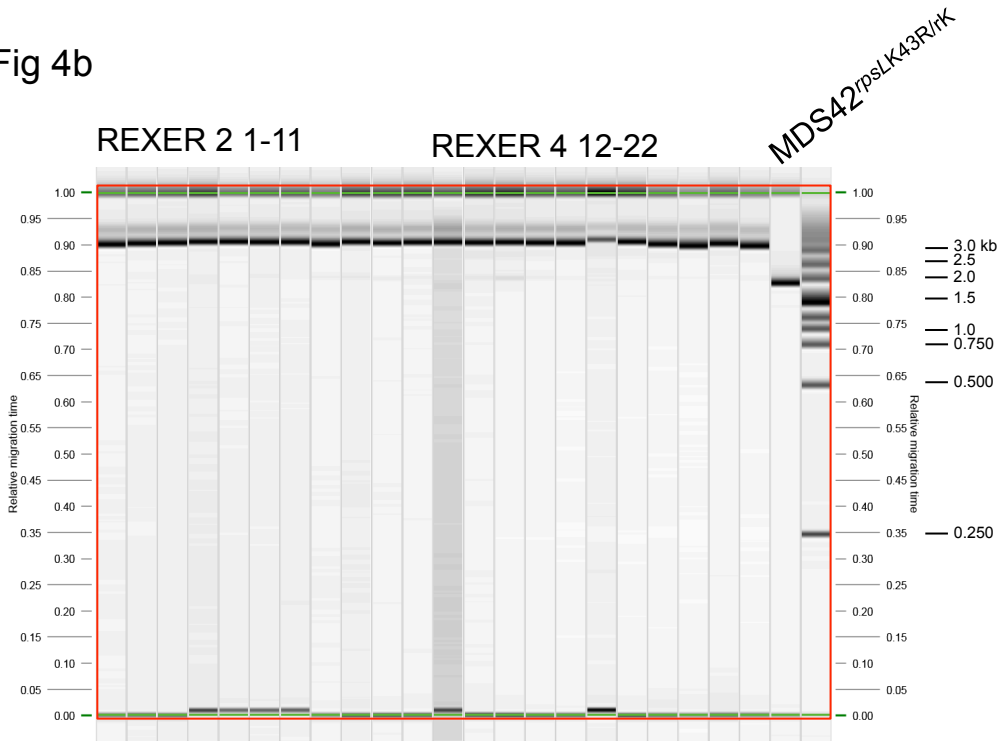

Ext Data Fig 4c

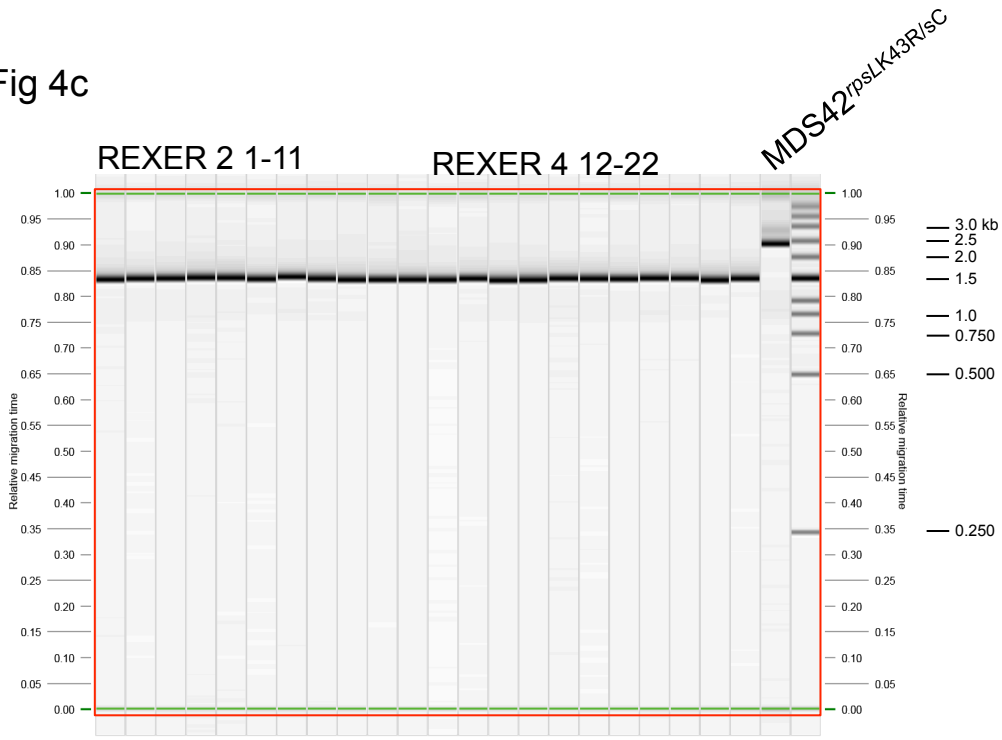

Ext Data Fig 8f

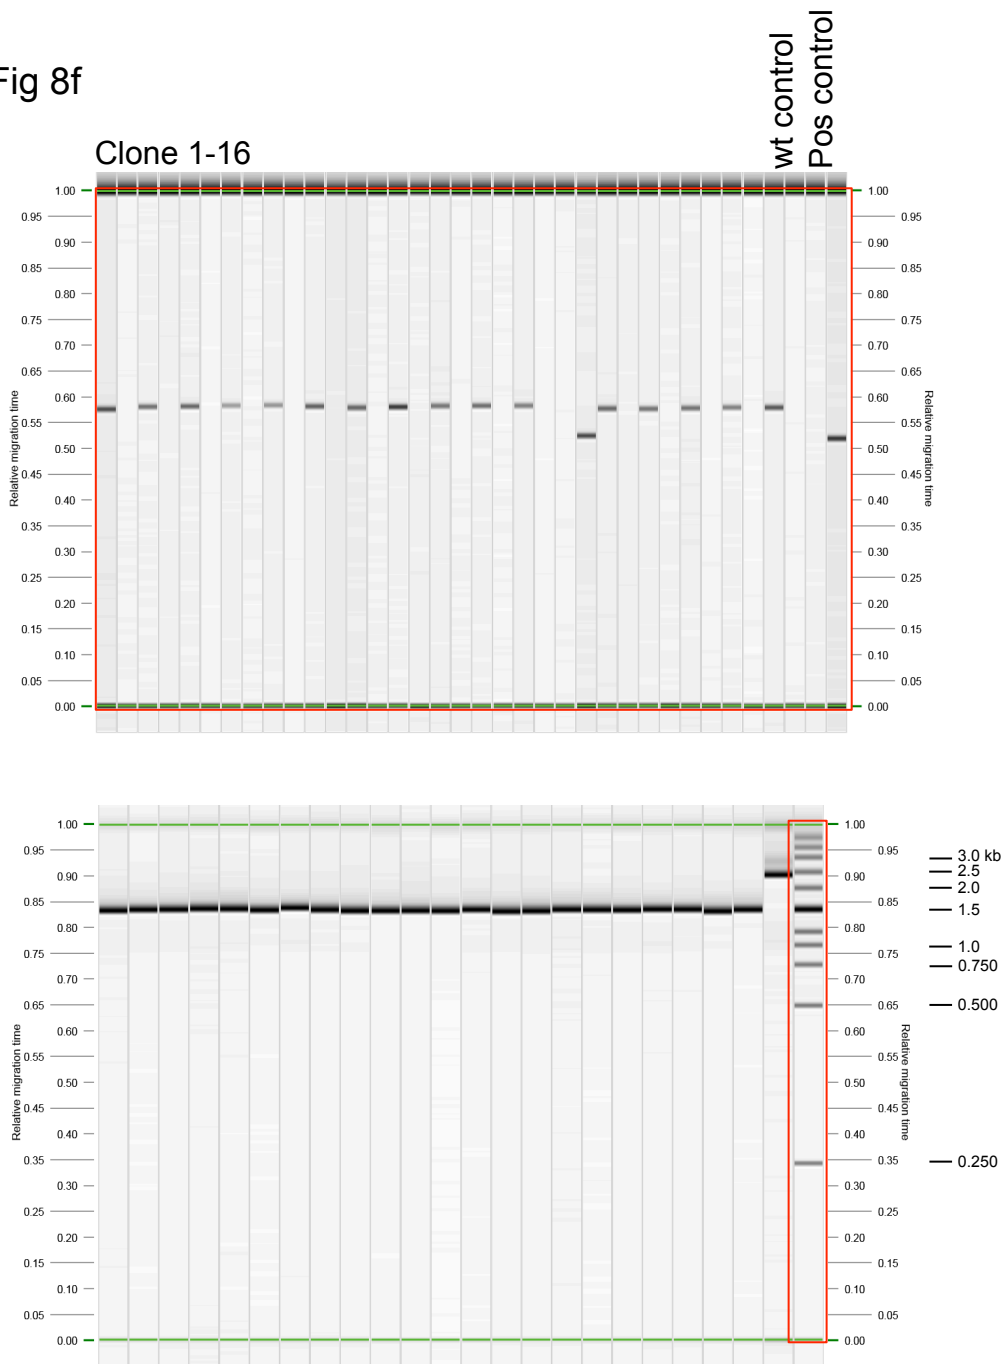

Supplement: NIHMS71206-supplement-Supp_Fig.pdf [file NIHMS71206-supplement-Supp_Fig.pdf]
